# Supplementary material
Source: Research Square preprint supplement (doi:10.21203/rs.3.rs-9066583/v1)
Supplement: Supplementary file 1 [file d0d3a3806103111774469db5.docx]

**Table 3** Greenness, Blueness, and Whiteness Assessment for Proposed Method and Reported Method

| Parameters | Proposed Method | Reported Method [34] |
| --- | --- | --- |
| Complex GAPI tool | 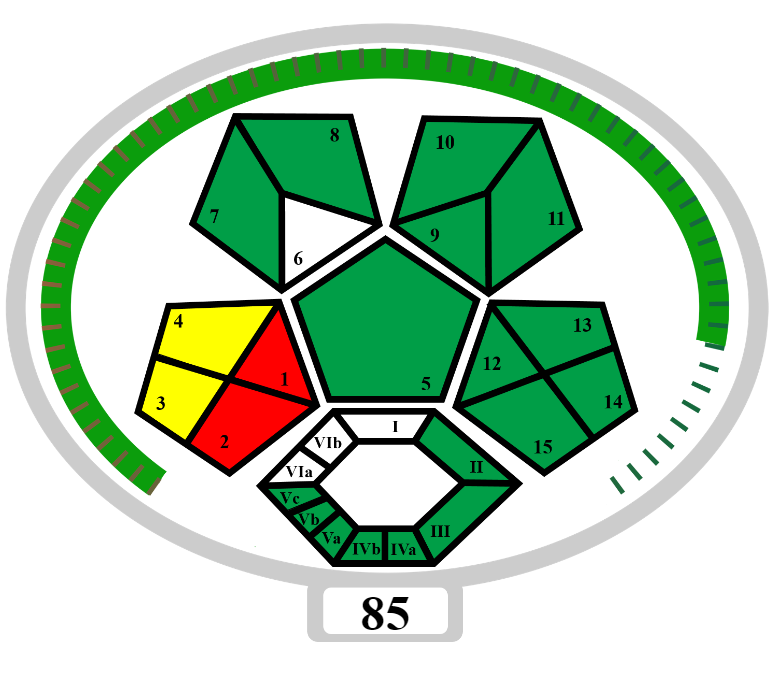 | 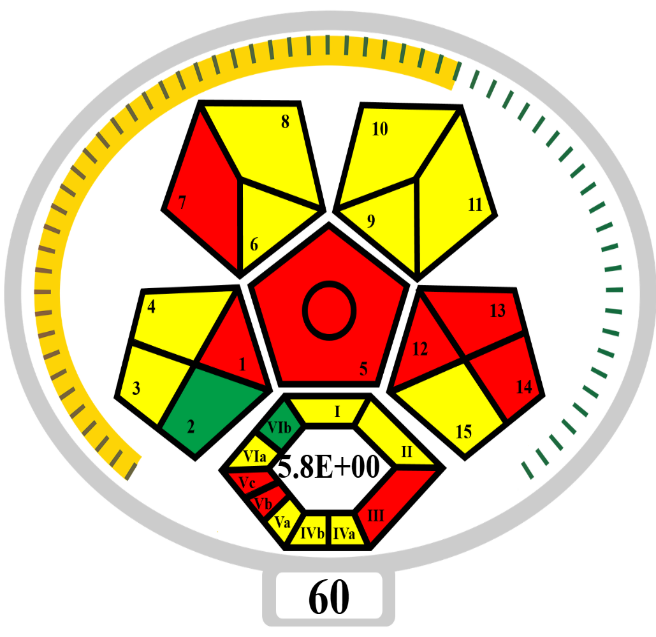 |
| AGREE tool | 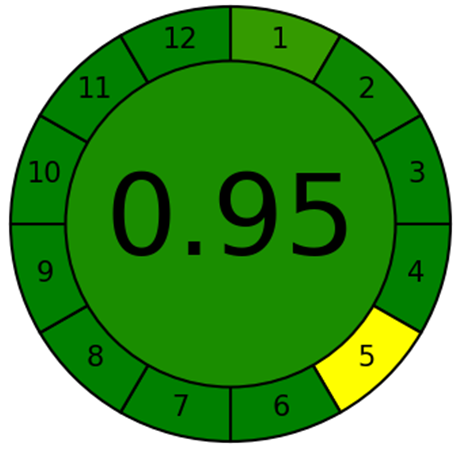 | 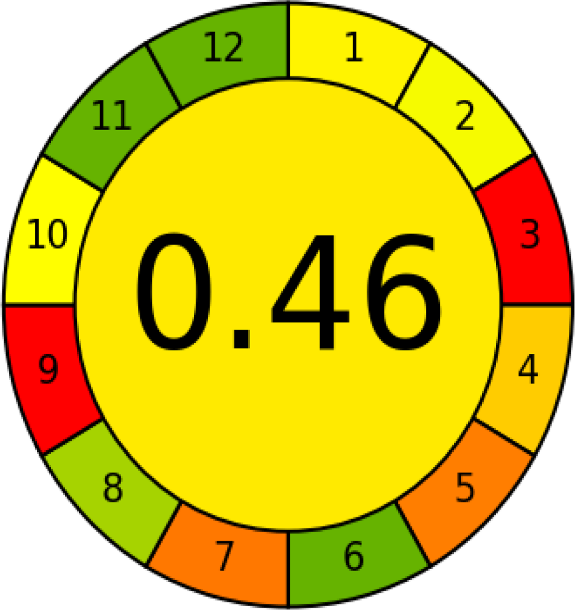 |
| BAGI tool  RGB12 | 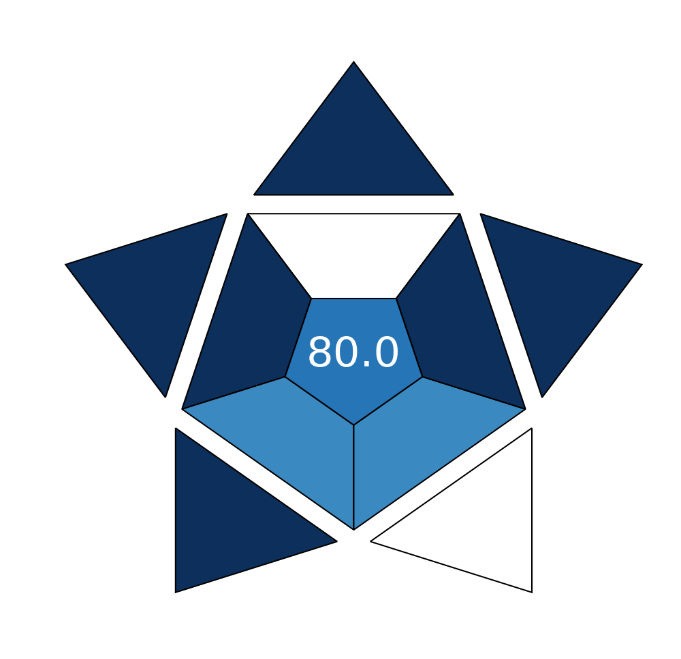  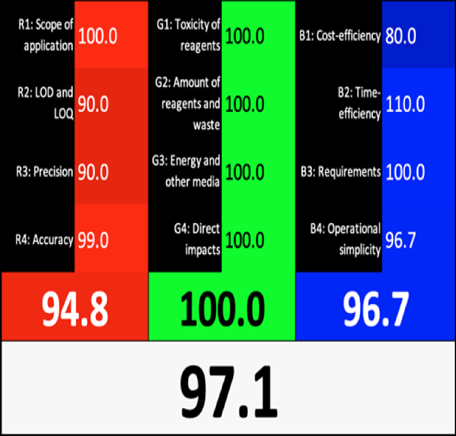 | 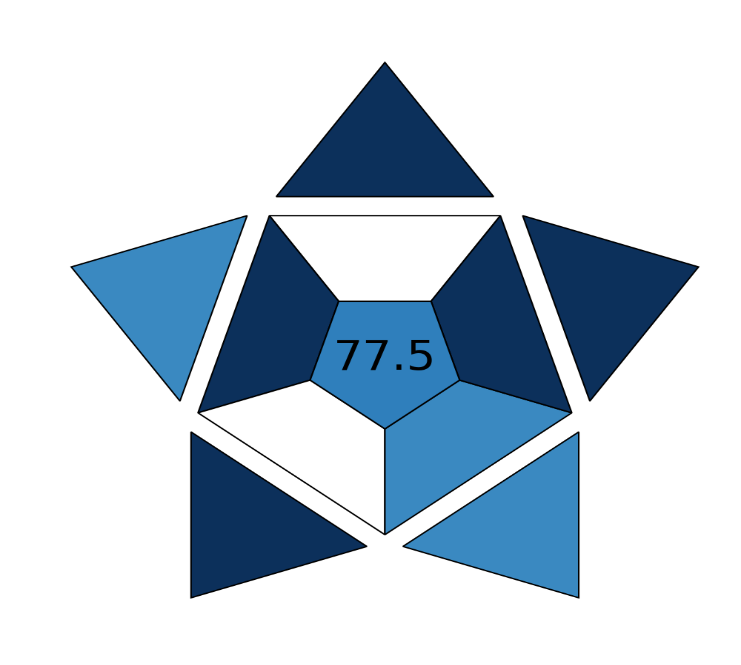  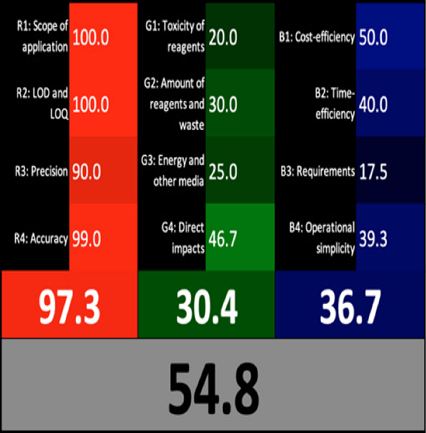 |
